# Supplementary material
Source: PubMed Central journal article supplement (PMC9357206)
Supplement: NIHMS1815033-supplement-1.pdf [file NIHMS1815033-supplement-1.pdf]

**Supplementary Table S1: Patient demographics for MPM PDOTs and TILs**

| MPM Sample ID | ADU-S100 Response | TAK-676 Response | Age | Gender | Histology | Neoadjuvant | Figures                  |
|---------------|-------------------|------------------|-----|--------|-----------|-------------|--------------------------|
| 1             | NR                | NT               | 77  | M      | E         | N           | 2C, 2D, S5B, S5C         |
| 2             | NR                | NT               | 79  | F      | E         | N           | 2C, 2D, S5B, S5C         |
| 3             | NR                | NT               | 70  | M      | B         | N           | 2C, 2D, S5C              |
| 4             | NR                | NT               | 69  | M      | E         | Y           | 2C, 2D, S5B              |
| 5             | NR                | NT               | U   | U      | U         | U           | 2C, 2D, S5B, S5C         |
| 6             | NR                | NT               | 68  | M      | B         | Y           | 2C, 2D, S5C              |
| 7             | NR                | NT               | 38  | F      | E         | N           | 2C, 2D, S5B, S5C         |
| 8             | NR                | NR               | 66  | M      | E         | Y           | 2C, 2D, 2F, S5C, S5B     |
| 9             | NR                | NR               | 68  | M      | E         | N           | 2C, 2D, 2F, S5C          |
| 10            | NR                | NR               | 79  | M      | E         | N           | 2C, 2D, 2F, S5C          |
| 11            | NR                | NT               | 52  | M      | B         | N           | 2C, 2D, S5B, S5C         |
| 12            | NR                | NR               | 74  | M      | E         | N           | 2C, 2D, 2F, 4A, S5C, S9A |
| 13            | NR                | NT               | 71  | M      | E         | Y           | 2C, 2D, S5B, S5C         |
| 14            | NR                | NT               | 75  | F      | B         | N           | 2C, 2D, S5B, S5C         |
| 15            | NR                | NT               | 71  | F      | B         | N           | 2C, 2D, S5C              |
| 16            | NR                | NT               | 77  | M      | E         | N           | 2C, 2D, S5C              |
| 17            | NR                | NR               | 53  | M      | E         | N           | 2C, 2D, 2F, S5C          |
| 18            | NR                | NT               | 80  | M      | B         | N           | 2C, 2D, S5C              |
| 19            | NR                | NT               | 76  | M      | E         | N           | 2C, 2D, S5B, S5C         |
| 20            | NR                | NT               | 72  | M      | B         | N           | 2C, 2D, S5B, S5C         |
| 21            | NR                | NT               | 79  | M      | B         | N           | 2C, 2D, S5B, S5C         |
| 22            | NR                | NR               | 77  | M      | E         | N           | 2C, 2D, 2F, S5C          |

|    |    |    |    |   |   |   |                                          |
|----|----|----|----|---|---|---|------------------------------------------|
| 23 | NR | NR | 73 | M | E | N | 2C, 2D, 2F, S5C                          |
| 24 | NR | R  | 69 | M | E | Y | 2C, 2D, 2F, S5C                          |
| 25 | NR | NT | 79 | F | B | N | 2C, 2D, S5C                              |
| 26 | NR | NR | 78 | F | E | N | 2C, 2D, 2F, 2G, 3, S5C, S6B, S6C, S7, S8 |
| 27 | NR | NT | 82 | F | E | N | 2C, 2D, S5B, S5C                         |
| 28 | NR | NT | 68 | F | E | Y | 2C, 2D, S5B, S5C                         |
| 29 | R  | NT | 67 | M | E | N | 2C, 2D, S5C                              |
| 30 | R  | NT | 79 | M | E | Y | 2C, 2D, S5B, S5C                         |
| 31 | R  | NT | 58 | F | E | N | 2C, 2D, S5B, S5C                         |
| 32 | R  | NT | 75 | M | E | N | 2C, 2D, 5C, S5C, S10C                    |
| 33 | R  | R  | 60 | M | E | N | 2C, 2D, 2F, S5A, S5C                     |
| 34 | R  | R  | 66 | M | E | N | 2C-E, 2F, S5C, S6A, S6E                  |
| 35 | R  | R  | 80 | M | B | Y | 2A-D, 2F, S5A, S5C                       |
| 36 | NR | NT | 83 | M | E | U | 5A, S10A                                 |
| 37 | NR | NT | 30 | F | B | U | 5B                                       |

R = response to treatment with cell death >20% above control, T-test p<0.05; NR = non-responder; NT = Not tested. F = female, M = Male gender. E = epithelioid MPM, B = biphasic MPM, Y/N = yes/no neoadjuvant treatment. U = unknown.

| TIL Batch Number | Age | Gender | Diagnosis      | Figures  |
|------------------|-----|--------|----------------|----------|
| 1                | 69  | F      | Stage II NSCLC | S9D      |
| 2                | 77  | F      | Stage II NSCLC | S9E, S9F |
| 3                | 66  | M      | Stage I NSCLC  | 4, S9C   |

F = female, M = Male gender. NSCLC = non-small cell lung cancer.

**Supplementary Table S2: Summary of patient demographics for *ex vivo* STING agonist treatment of MPM tumors**

|                            | <b>ADU-S100<br/>Responder</b> | <b>Non-<br/>responder</b> |
|----------------------------|-------------------------------|---------------------------|
| <b>Total Patients</b>      | 7                             | 30                        |
| <b>Median Age (years)</b>  | 67                            | 73                        |
| <b>Gender</b>              |                               |                           |
| <b>Male</b>                | 6 (86%)                       | 20 (67%)                  |
| <b>Female</b>              | 1 (14%)                       | 9 (30%)                   |
| <b>Not recorded</b>        | 0                             | 1 (3%)                    |
| <b>Histology</b>           |                               |                           |
| <b>Epithelioid</b>         | 6 (86%)                       | 19 (63%)                  |
| <b>Biphasic</b>            | 1 (14%)                       | 10 (33%)                  |
| <b>Sarcomatoid</b>         | 0                             | 0                         |
| <b>Not recorded</b>        | 0                             | 1 (4%)                    |
| <b>Neoadjuvant Therapy</b> |                               |                           |
| <b>Yes</b>                 | 2 (29%)                       | 6 (20%)                   |
| <b>No</b>                  | 5 (71%)                       | 21 (70%)                  |
| <b>Not recorded</b>        | 0                             | 3 (10%)                   |

**Supplementary Table S3: Antibodies used in flow cytometry and western blot experiments**

| <b>Target</b>  | <b>Clone</b> | <b>Manufacturer</b> | <b>Cat. No.</b> |
|----------------|--------------|---------------------|-----------------|
| CD69           | FN50         | BioLegend           | 310904          |
| CD16           | 3G8          | BioLegend           | 302006          |
| CD8            | RPA-T8       | Thermo Fisher       | BDB560662       |
| CCR2           | K036C2       | BioLegend           | 357203          |
| CD38           | HIT2         | BioLegend           | 303506          |
| CD11c          | 3.9          | BioLegend           | 301605          |
| CCR7           | 150503       | Thermo Fisher       | BDB62381        |
| CD56           | GDC56        | BioLegend           | 318348          |
| LAG-3          | 11C3C65      | BioLegend           | 369309          |
| CD103          | B-Ly7        | Thermo Fisher       | 25-1038-41      |
| TIM-3          | F38-2E2      | BioLegend           | 345012          |
| PD-L1          | 29E.2A3      | BioLegend           | 329708          |
| CD3            | UCHT1        | BioLegend           | 300424          |
| PD-1           | EH12.2H7     | BioLegend           | 329920          |
| HLA-DR         | G46-6        | Thermo Fisher       | BDB562804       |
| CD45RA         | HL100        | BioLegend           | 304142          |
| CD15           | SSEA-1       | BioLegend           | 323028          |
| CTLA-4         | BNI3         | BioLegend           | 369609          |
| CD19           | HIB19        | BioLegend           | 302243          |
| CD45           | H130         | BioLegend           | 304050          |
| CD4            | PRA-T4       | BioLegend           | 300554          |
| CD14           | M5E2         | BioLegend           | 301840          |
| Mesothelin     | REA1057      | Miltenyi            | 130-118-168     |
| STING          | D2P2F        | Cell Signaling      | 13647           |
| pTBK1          | D52C2        | Cell Signaling      | 5483            |
| TBK1           | Polyclonal   | Cell Signaling      | 3013            |
| pIRF3          | 4D4G         | Cell Signaling      | 4947            |
| IRF3           | D6I4C        | Cell Signaling      | 11904           |
| pSTAT1         | 58D6         | Cell Signaling      | 9167            |
| STAT1          | Polyclonal   | Cell Signaling      | 9172            |
| IFNAR-1        | Polyclonal   | Thermal Fischer     | PA5-79441       |
| $\beta$ -Actin | C4           | Santa Cruz          | sc-47778        |

**Supplementary Table S4: Gene signatures for scRNAseq**

| <b>B-cell</b> | <b>Macrophage</b> | <b>Fibroblast</b> | <b>T-Cell</b> | <b>Tumor</b> | <b>NK Cell</b>  | <b>NK Active</b> | <b>NK T-cell</b> | <b>Other T-cell</b> | <b>V-gene</b>   |                 |                    |
|---------------|-------------------|-------------------|---------------|--------------|-----------------|------------------|------------------|---------------------|-----------------|-----------------|--------------------|
| <i>CD79A</i>  | <i>CD14</i>       | <i>COL3A1</i>     | <i>TCF7</i>   | <i>MSLN</i>  | <i>SH2D1B</i>   | <i>PRF1</i>      | <i>CD3D</i>      | <i>SELL</i>         | <i>TRBV2</i>    | <i>TRBV12-4</i> | <i>TRAV8-3</i>     |
| <i>IGHM</i>   | <i>VSIG4</i>      | <i>COL4A1</i>     | <i>CD3G</i>   | <i>ANXA8</i> | <i>TRDC</i>     | <i>KLRB1</i>     | <i>CD3E</i>      | <i>CCR7</i>         | <i>TRBV3-1</i>  | <i>TRBV14</i>   | <i>TRAV13-1</i>    |
| <i>CD79B</i>  | <i>C1QB</i>       | <i>COL4A2</i>     | <i>CD3D</i>   | <i>CALB2</i> | <i>TYROBP</i>   | <i>TNFSF10</i>   | <i>CD2</i>       | <i>S1PR1</i>        | <i>TRBV4-1</i>  | <i>TRBV18</i>   | <i>TRAV12-2</i>    |
| <i>MS4A1</i>  | <i>C1QA</i>       | <i>COL4A5</i>     | <i>CD4</i>    | <i>INHBA</i> | <i>KLRD1</i>    | <i>CCL5</i>      | <i>CCL5</i>      | <i>SPOCK2</i>       | <i>TRBV5-1</i>  | <i>TRBV19</i>   | <i>TRAV8-4</i>     |
|               | <i>APOE</i>       | <i>COL4A6</i>     | <i>CD28</i>   | <i>ITLN1</i> | <i>TNFRSF18</i> | <i>NKG7</i>      | <i>CST7</i>      | <i>GIMAP5</i>       | <i>TRBV6-1</i>  | <i>TRBV20-1</i> | <i>TRAV13-2</i>    |
|               |                   | <i>COL5A1</i>     | <i>BCL11B</i> | <i>MGARP</i> | <i>NKG7</i>     | <i>KLRD1</i>     | <i>TRBC2</i>     | <i>GIMAP7</i>       | <i>TRBV4-2</i>  | <i>TRBV21-1</i> | <i>TRAV14DV4</i>   |
|               |                   | <i>COL5A2</i>     | <i>CD8A</i>   | <i>HEG1</i>  | <i>KLRB1</i>    | <i>NCAM1</i>     | <i>CXCR4</i>     | <i>LTB</i>          | <i>TRBV6-2</i>  | <i>TRBV24-1</i> | <i>TRAV9-2</i>     |
|               |                   | <i>COL6A1</i>     | <i>CD8B</i>   |              | <i>GNLY</i>     | <i>NCR1</i>      | <i>CD8A</i>      | <i>CXCR4</i>        | <i>TRBV7-2</i>  | <i>TRBV27</i>   | <i>TRAV12-3</i>    |
|               |                   | <i>COL6A2</i>     |               |              | <i>IL2RB</i>    | <i>NCR2</i>      | <i>GZMK</i>      | <i>IL7R</i>         | <i>TRBV6-4</i>  | <i>TRBV28</i>   | <i>TRAV8-6</i>     |
|               |                   | <i>COL8A1</i>     |               |              | <i>CTSW</i>     | <i>NCR3</i>      | <i>IL32</i>      | <i>YNE2</i>         | <i>TRBV7-3</i>  | <i>TRBV29-1</i> | <i>TRAV17</i>      |
|               |                   | <i>COL12A1</i>    |               |              | <i>ALOX5AP</i>  | <i>FCER1G</i>    | <i>PLAAT4</i>    | <i>SARAF</i>        | <i>TRBV9</i>    | <i>TRBV30</i>   | <i>TRAV19</i>      |
|               |                   | <i>COL17A1</i>    |               |              | <i>GZMB</i>     | <i>KIR2DL1</i>   | <i>GZMA</i>      | <i>IFITM1</i>       | <i>TRBV11-2</i> | <i>TRAV1-2</i>  | <i>TRAV21</i>      |
|               |                   | <i>S100A16</i>    |               |              |                 | <i>KIR2DL3</i>   |                  |                     | <i>TRBV6-5</i>  | <i>TRAV2</i>    | <i>TRAV22</i>      |
|               |                   | <i>UGDH</i>       |               |              |                 | <i>KIR2DL4</i>   |                  |                     | <i>TRBV7-4</i>  | <i>TRAV4</i>    | <i>TRAV23DV6</i>   |
|               |                   | <i>LOXL1</i>      |               |              |                 | <i>KLRC1</i>     |                  |                     | <i>TRBV5-4</i>  | <i>TRAV5</i>    | <i>TRAV24</i>      |
|               |                   | <i>PCOLCE2</i>    |               |              |                 | <i>KLRC4</i>     |                  |                     | <i>TRBV7-6</i>  | <i>TRAV6</i>    | <i>TRAV25</i>      |
|               |                   | <i>ADAMTS2</i>    |               |              |                 | <i>FCGR3A</i>    |                  |                     | <i>TRBV7-9</i>  | <i>TRAV8-1</i>  | <i>TRAV26-1</i>    |
|               |                   |                   |               |              |                 | <i>KIR3DL1</i>   |                  |                     | <i>TRBV13</i>   | <i>TRAV10</i>   | <i>TRAV29DV5</i>   |
|               |                   |                   |               |              |                 | <i>KIR3DL2</i>   |                  |                     | <i>TRBV10-3</i> | <i>TRAV12-1</i> | <i>TRAV26-2</i>    |
|               |                   |                   |               |              |                 |                  |                  |                     | <i>TRBV12-3</i> | <i>TRAV8-2</i>  | <i>TRAV35</i>      |
|               |                   |                   |               |              |                 |                  |                  |                     |                 |                 | <i>TRAV36DV7</i>   |
|               |                   |                   |               |              |                 |                  |                  |                     |                 |                 | <i>TRAV38-1</i>    |
|               |                   |                   |               |              |                 |                  |                  |                     |                 |                 | <i>TRAV38-2DV8</i> |
|               |                   |                   |               |              |                 |                  |                  |                     |                 |                 | <i>TRAV39</i>      |
|               |                   |                   |               |              |                 |                  |                  |                     |                 |                 | <i>TRAV41</i>      |

**Supplementary Table S5: Expression changes with STING agonist treatment**

| <b>40 Most Increased Genes with Treatment (10µM ADU-S100)</b> |                |                   |              |              |                  |
|---------------------------------------------------------------|----------------|-------------------|--------------|--------------|------------------|
| <b>Gene</b>                                                   | <b>p value</b> | <b>avg log2FC</b> | <b>pct.1</b> | <b>pct.2</b> | <b>p val adj</b> |
| <i>ISG15</i>                                                  | 3.23E-39       | 5.19              | 1.00         | 0.71         | 7.54E-35         |
| <i>IFI27</i>                                                  | 4.01E-29       | 4.89              | 0.87         | 0.12         | 9.35E-25         |
| <i>IFI6</i>                                                   | 1.01E-38       | 4.76              | 1.00         | 0.57         | 2.35E-34         |
| <i>RSAD2</i>                                                  | 2.73E-37       | 4.43              | 0.97         | 0.02         | 6.37E-33         |
| <i>IFIT3</i>                                                  | 1.04E-36       | 4.01              | 0.98         | 0.56         | 2.43E-32         |
| <i>IFIT2</i>                                                  | 1.94E-30       | 3.99              | 0.92         | 0.39         | 4.53E-26         |
| <i>IFIT1</i>                                                  | 1.83E-36       | 3.89              | 0.97         | 0.26         | 4.28E-32         |
| <i>ISG20</i>                                                  | 4.04E-36       | 3.89              | 0.98         | 0.72         | 9.43E-32         |
| <i>IL32</i>                                                   | 1.86E-23       | 3.43              | 0.82         | 0.23         | 4.34E-19         |
| <i>IFITM1</i>                                                 | 3.04E-23       | 3.42              | 0.85         | 0.33         | 7.10E-19         |
| <i>OAS1</i>                                                   | 4.07E-38       | 3.40              | 0.99         | 0.13         | 9.51E-34         |
| <i>WARS</i>                                                   | 1.33E-27       | 3.24              | 0.94         | 0.80         | 3.11E-23         |
| <i>LY6E</i>                                                   | 1.61E-38       | 3.24              | 1.00         | 0.95         | 3.77E-34         |
| <i>CXCL10</i>                                                 | 2.50E-10       | 3.10              | 0.43         | 0.00         | 5.83E-06         |
| <i>C15orf48</i>                                               | 1.18E-25       | 3.02              | 0.91         | 0.54         | 2.76E-21         |
| <i>OASL</i>                                                   | 9.30E-35       | 3.01              | 0.94         | 0.05         | 2.17E-30         |
| <i>TFPI2</i>                                                  | 5.10E-12       | 2.88              | 0.60         | 0.16         | 1.19E-07         |
| <i>BST2</i>                                                   | 1.38E-16       | 2.86              | 0.61         | 0.02         | 3.22E-12         |
| <i>MX1</i>                                                    | 5.77E-36       | 2.84              | 0.96         | 0.10         | 1.35E-31         |
| <i>LAP3</i>                                                   | 1.26E-33       | 2.78              | 0.97         | 0.90         | 2.94E-29         |
| <i>IFI35</i>                                                  | 6.12E-34       | 2.69              | 0.97         | 0.84         | 1.43E-29         |
| <i>PLSCR1</i>                                                 | 1.58E-35       | 2.64              | 0.97         | 0.75         | 3.69E-31         |
| <i>SAA1</i>                                                   | 7.21E-12       | 2.46              | 0.63         | 0.15         | 1.68E-07         |
| <i>CXCL11</i>                                                 | 4.41E-12       | 2.45              | 0.48         | 0.00         | 1.03E-07         |
| <i>IRF7</i>                                                   | 5.88E-36       | 2.44              | 0.98         | 0.82         | 1.37E-31         |
| <i>PLAAT4</i>                                                 | 2.08E-25       | 2.38              | 0.90         | 0.49         | 4.86E-21         |
| <i>IFI30</i>                                                  | 3.79E-21       | 2.24              | 0.75         | 0.15         | 8.85E-17         |
| <i>IL1B</i>                                                   | 2.62E-07       | 2.23              | 0.55         | 0.30         | 0.0061082        |
| <i>IL1RN</i>                                                  | 1.12E-15       | 2.21              | 0.74         | 0.28         | 2.62E-11         |
| <i>CXCL1</i>                                                  | 3.53E-08       | 2.20              | 0.61         | 0.30         | 0.0008241        |
| <i>CMPK2</i>                                                  | 1.25E-31       | 2.19              | 0.89         | 0.03         | 2.91E-27         |
| <i>CCL5</i>                                                   | 1.26E-06       | 2.10              | 0.29         | 0.00         | 0.0294404        |
| <i>HLA-B</i>                                                  | 1.84E-36       | 2.09              | 1.00         | 1.00         | 4.29E-32         |
| <i>STAT1</i>                                                  | 8.11E-32       | 2.09              | 0.94         | 0.57         | 1.89E-27         |
| <i>HLA-C</i>                                                  | 1.34E-36       | 2.08              | 1.00         | 1.00         | 3.12E-32         |
| <i>HES4</i>                                                   | 2.74E-25       | 2.07              | 0.91         | 0.56         | 6.40E-21         |
| <i>WFDC2</i>                                                  | 3.52E-07       | 2.06              | 0.73         | 0.62         | 0.0082103        |
| <i>TNFSF13B</i>                                               | 5.30E-23       | 2.03              | 0.77         | 0.08         | 1.24E-18         |
| <i>OAS3</i>                                                   | 9.16E-33       | 2.02              | 0.93         | 0.28         | 2.14E-28         |
| <i>MDK</i>                                                    | 3.49E-16       | 2.01              | 0.72         | 0.28         | 8.15E-12         |
|                                                               |                |                   |              |              |                  |
|                                                               |                |                   |              |              |                  |
| <b>20 Most Decreased Genes with Treatment</b>                 |                |                   |              |              |                  |
| <b>Gene</b>                                                   | <b>p value</b> | <b>avg log2FC</b> | <b>pct.1</b> | <b>pct.2</b> | <b>p val adj</b> |
| <i>TGFB1</i>                                                  | 4.65E-28       | -2.38             | 0.57         | 0.98         | 1.09E-23         |
| <i>SERPIN3</i>                                                | 2.15E-28       | -2.15             | 0.52         | 0.98         | 5.02E-24         |
| <i>KRT19</i>                                                  | 1.57E-17       | -1.81             | 0.83         | 1.00         | 3.66E-13         |
| <i>SERPIN7</i>                                                | 1.88E-19       | -1.73             | 0.58         | 0.95         | 4.40E-15         |
| <i>CCDC80</i>                                                 | 3.66E-23       | -1.57             | 0.79         | 1.00         | 8.56E-19         |
| <i>ANGPTL4</i>                                                | 9.13E-13       | -1.48             | 0.33         | 0.72         | 2.13E-08         |
| <i>IGFBP4</i>                                                 | 5.58E-13       | -1.42             | 0.75         | 0.97         | 1.30E-08         |

|                 |          |       |      |      |          |
|-----------------|----------|-------|------|------|----------|
| <b>GPI</b>      | 4.12E-23 | -1.27 | 0.71 | 0.98 | 9.62E-19 |
| <b>SERPINB4</b> | 2.22E-17 | -1.25 | 0.46 | 0.90 | 5.19E-13 |
| <b>CEMIP</b>    | 1.11E-33 | -1.20 | 0.14 | 0.71 | 2.59E-29 |
| <b>LDHA</b>     | 5.51E-25 | -1.16 | 0.98 | 1.00 | 1.29E-20 |
| <b>PABPC1</b>   | 8.78E-22 | -1.11 | 0.95 | 1.00 | 2.05E-17 |
| <b>TPI1</b>     | 5.70E-21 | -1.11 | 0.96 | 1.00 | 1.33E-16 |
| <b>RPSA</b>     | 1.71E-27 | -1.10 | 0.97 | 1.00 | 4.00E-23 |
| <b>RPS29</b>    | 1.97E-31 | -1.10 | 0.89 | 1.00 | 4.61E-27 |
| <b>RPL41</b>    | 1.57E-31 | -1.09 | 0.95 | 1.00 | 3.66E-27 |
| <b>NDRG1</b>    | 6.92E-13 | -1.07 | 0.48 | 0.90 | 1.62E-08 |
| <b>ID1</b>      | 1.11E-13 | -1.07 | 0.29 | 0.72 | 2.60E-09 |
| <b>PGK1</b>     | 2.74E-22 | -1.04 | 0.92 | 1.00 | 6.39E-18 |
| <b>TUBA1A</b>   | 6.65E-22 | -1.02 | 0.23 | 0.75 | 1.55E-17 |

# Supplementary Figure S1: Flow cytometry dot plots and gating strategy

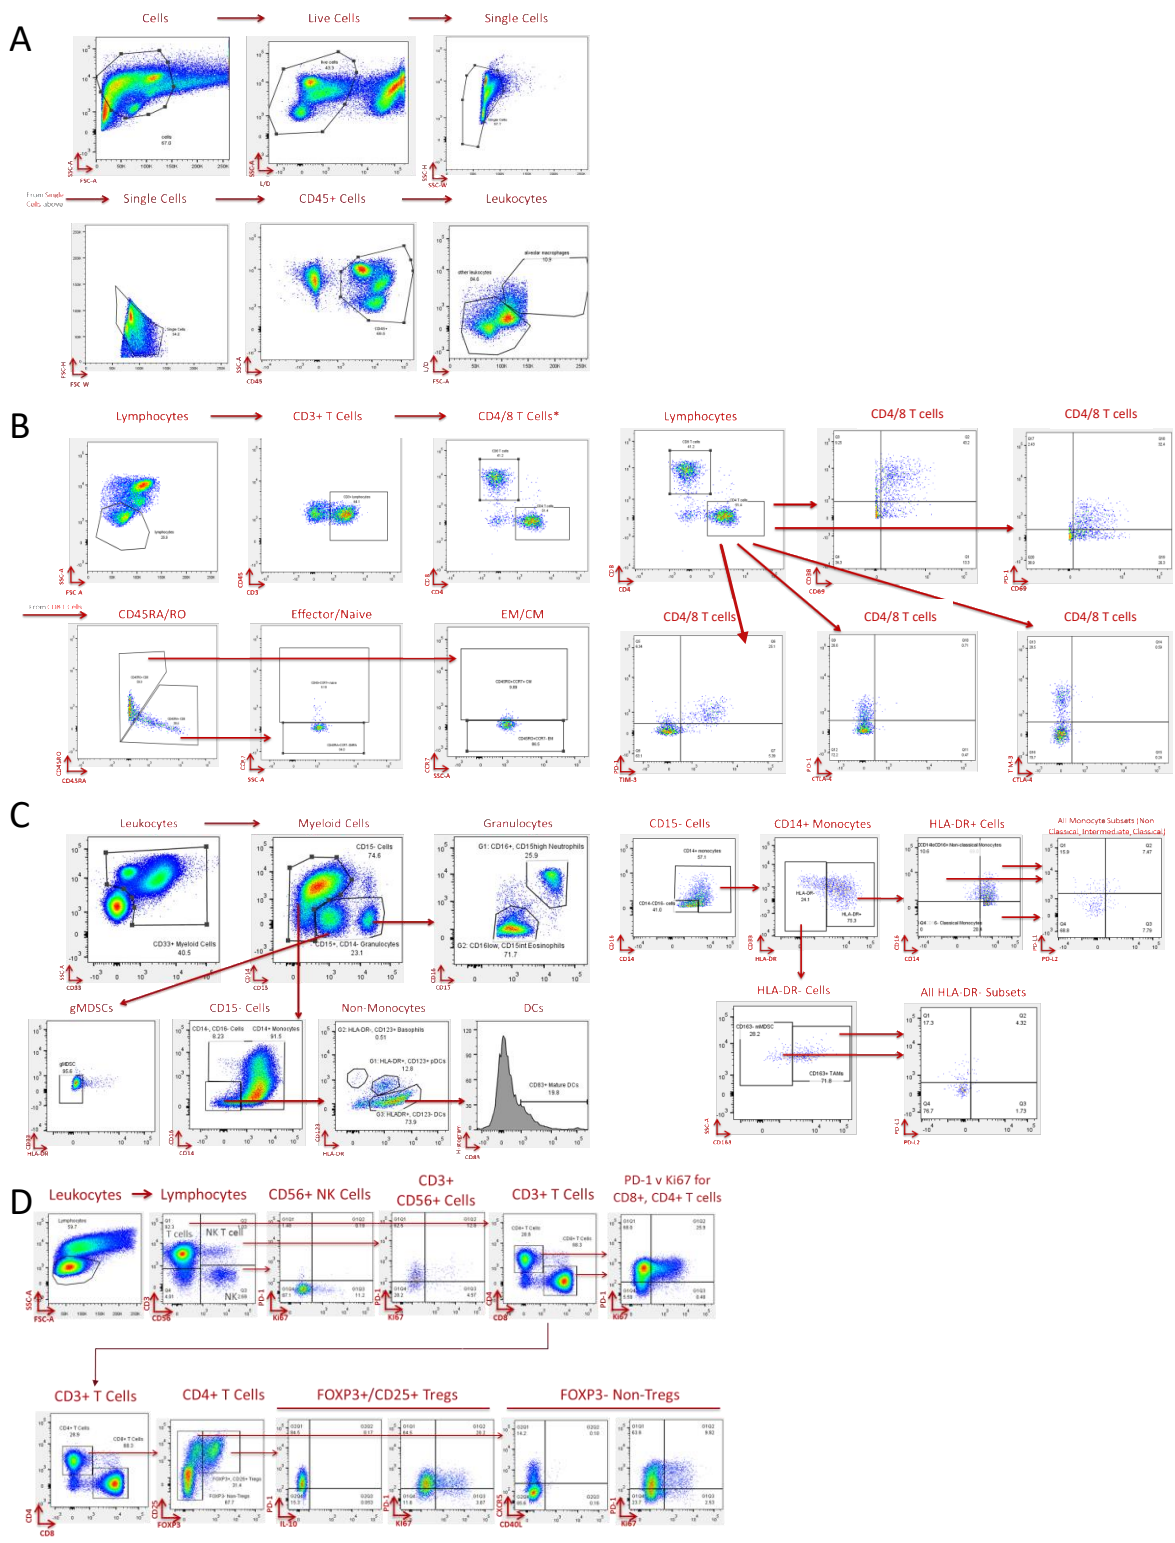

**A**, Gating strategy and example for viable CD45+ cells. **B**, Gating hierarchy for T cell lineage and phenotypic marker. **C**, Myeloid cell gating hierarchy. **D**, Gating for NK lineage and Tregs.



## Supplementary Figure S2: MSLN CAR Construct Design and Map

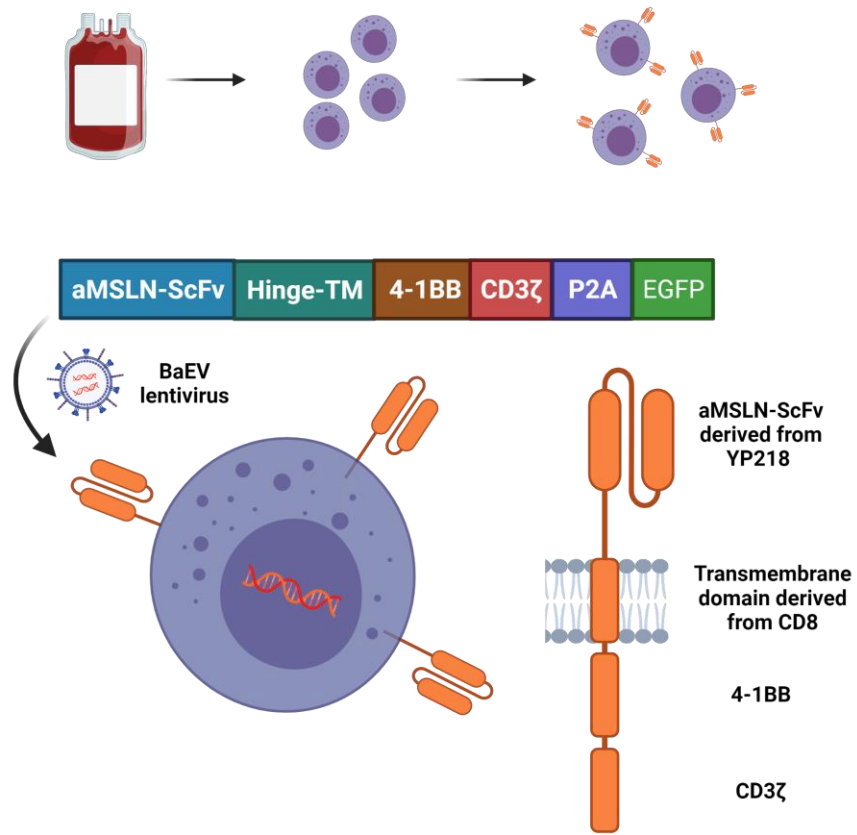

NK-cell isolation and transduction with anti-mesothelin (MSLN) CAR construct (see methods for details).

## Supplementary Figure S3: MPM STING and immune characterization

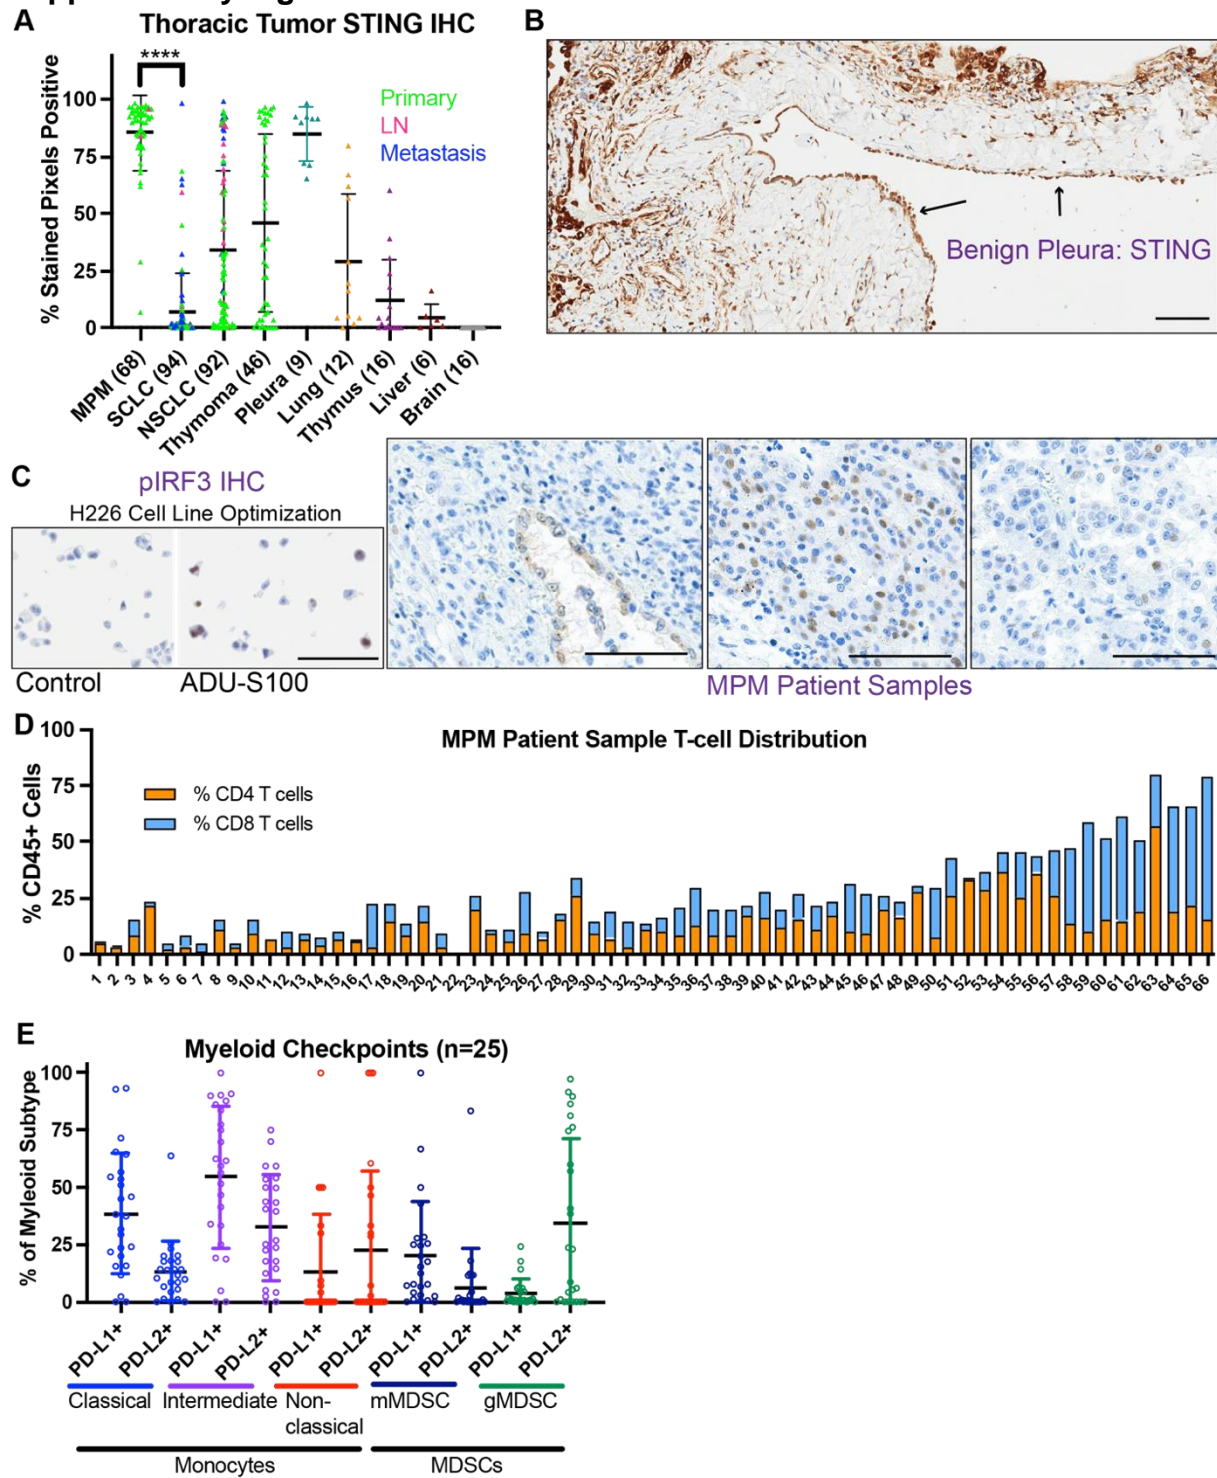

**A**, STING IHC in thoracic cancers and adjacent normal tissues quantified using QuPath software. Source of tissue indicated by color of dot (primary tumor, LN=lymph node, distant metastasis). MPM = malignant pleural mesothelioma; SCLC = small-cell lung carcinoma; NSCLC = non-small cell lung carcinoma. Kruskal Wallis  $p < 0.0001$  with Dunn's multiple comparisons test: \*\*\*\* $p < 0.0001$ . **B**, STING IHC in normal pleura ( $n=9$  total samples with similar appearance). Scale bar = 100  $\mu\text{m}$ . **C**, Phospho-IRF3 (pIRF3) IHC optimization in H226 MPM cells after 24-hour treatment with 50  $\mu\text{M}$  ADU-S100. pIRF3 IHC in MPM tumor specimens ( $n=31$  total samples stained). Scale bars = 100  $\mu\text{m}$ . **D** and **E**, Flow cytometry from freshly resected MPM specimens with number of samples specified either in the graph title or in parentheses on the x axis label. Flow cytometry antibody details provided in **Supplementary Table S3**. mMDSC = monocytic myeloid-derived suppressor cells; gMDSC = granulocytic myeloid-derived suppressor cells.

**Supplementary Figure S4: STING expression and activation in MPM cell lines**

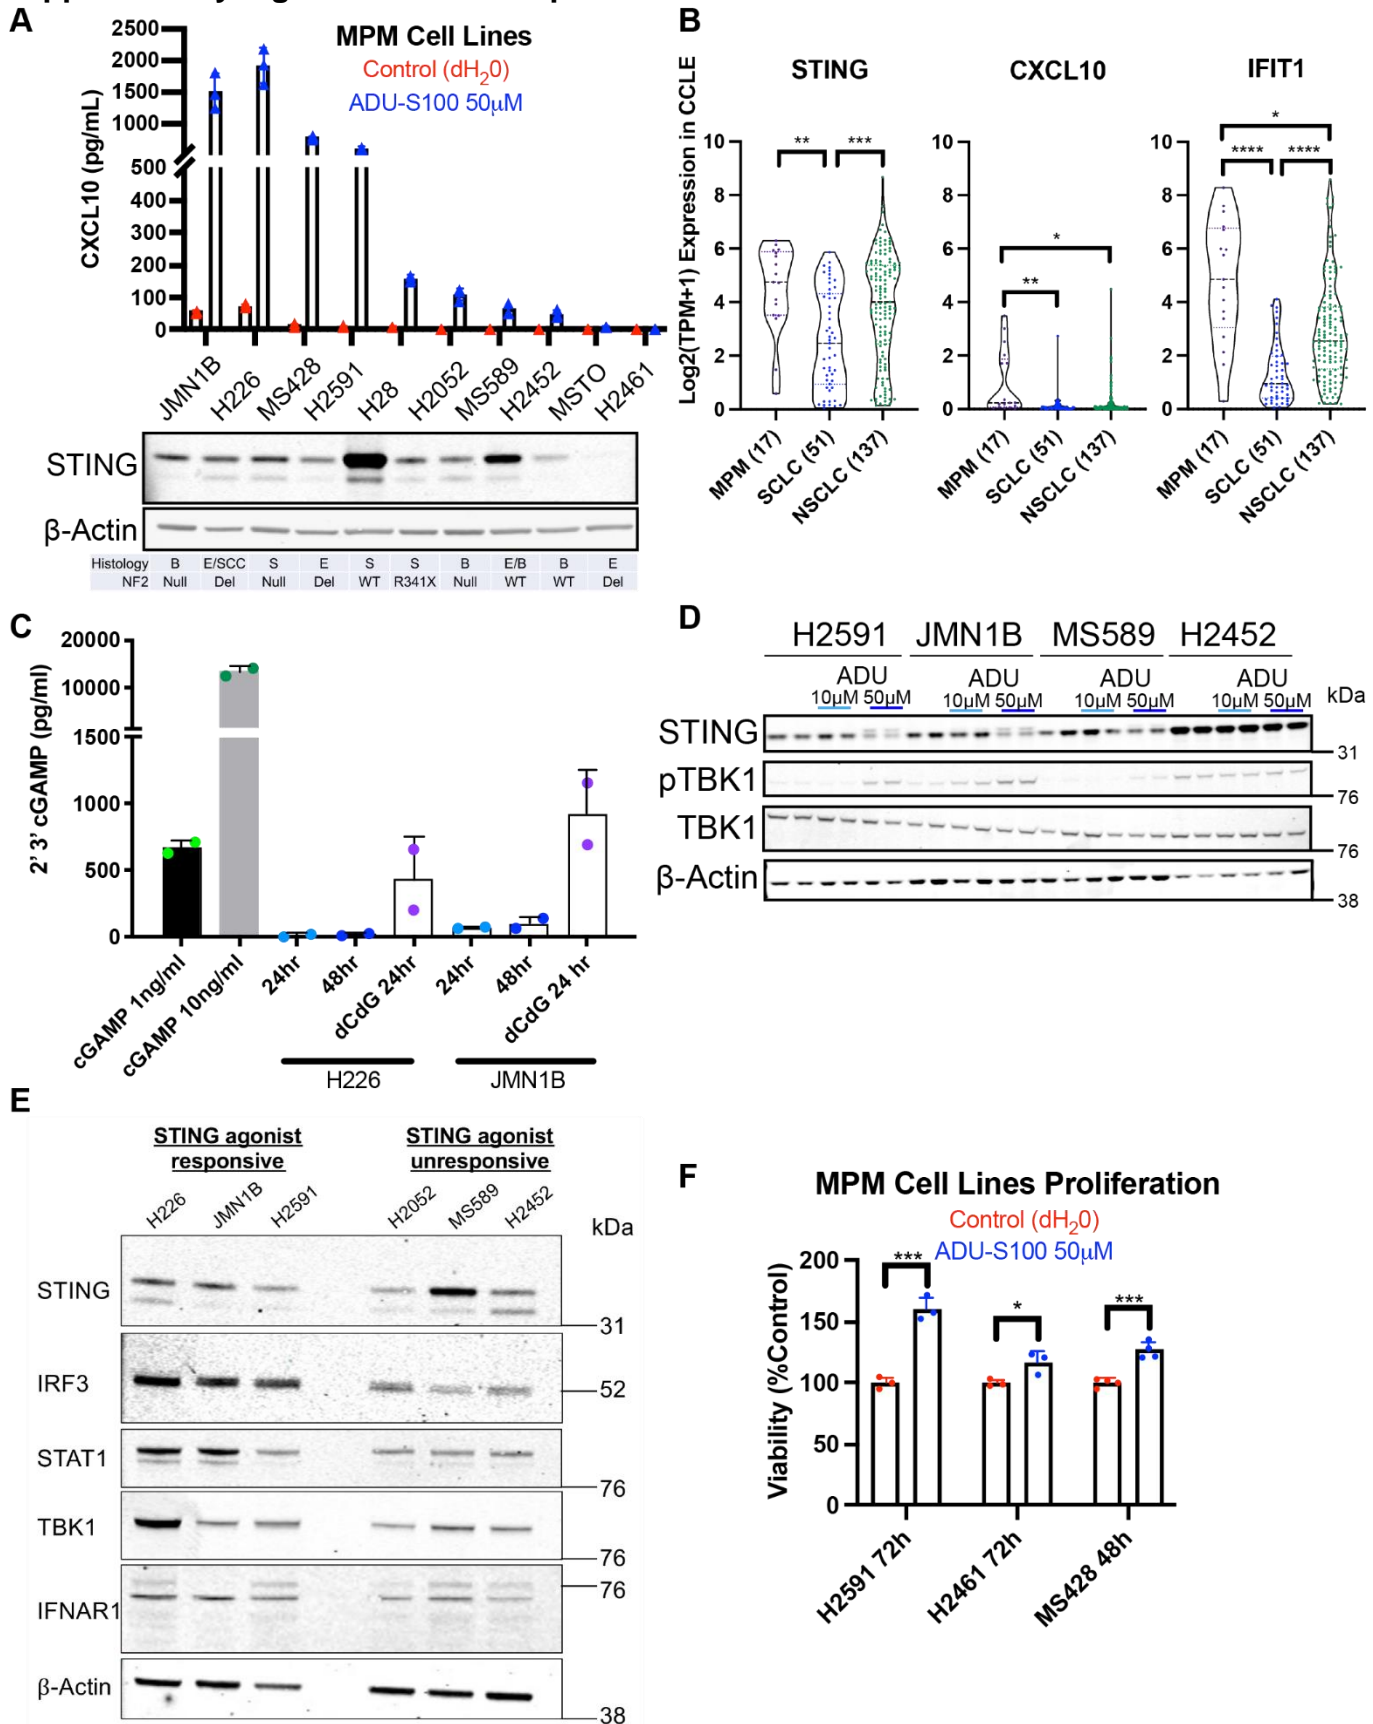

**A**, ELISA for CXCL10 after 24-hour treatment with 50  $\mu$ M ADU-S100 or dH<sub>2</sub>O control in MPM cell lines. Western blot for STING and beta-actin load control using untreated lysates from each cell line. Publicly available characteristics for each cell line shown in the table below. **B**, mRNA expression data from the Cancer Cell Line Encyclopedia (CCLE) database comparing expression in malignant pleural mesothelioma (MPM), small-cell lung carcinoma (SCLC) and non-small cell lung carcinoma cell lines. Kruskal Wallis  $p < 0.0001$  for STING and IFIT1,  $p < 0.01$  for CXCL10 with Dunn's multiple comparisons tests as shown: \* $p < 0.05$ , \*\* $p < 0.01$ , \*\*\* $p < 0.001$ , \*\*\*\* $p < 0.0001$ . **C**, 2'3' cGAMP ELISA from MPM cell lines at 24 and 48-hours of culture with poly (dG:dC) treatment used as positive control (1  $\mu$ g). **D**, Western blot for STING, phospho-TBK1 (pTBK1), TBK1, and beta-actin load control in MPM cell lines treated for 6 hours with the indicated doses of ADU-S100 in duplicate. **E**, Western blot for STING pathway components and beta-actin load control in MPM cell lines. **F**, CellTiter-Glo viability assay in MPM cell lines treated with 50  $\mu$ M ADU-S100 or dH<sub>2</sub>O control for the indicated number of hours. T-test: \* $p < 0.05$ , \*\*\* $p < 0.001$ .

# Supplementary Figure S5: Ex vivo STING agonist treatment of MPM tumors in PDOTS

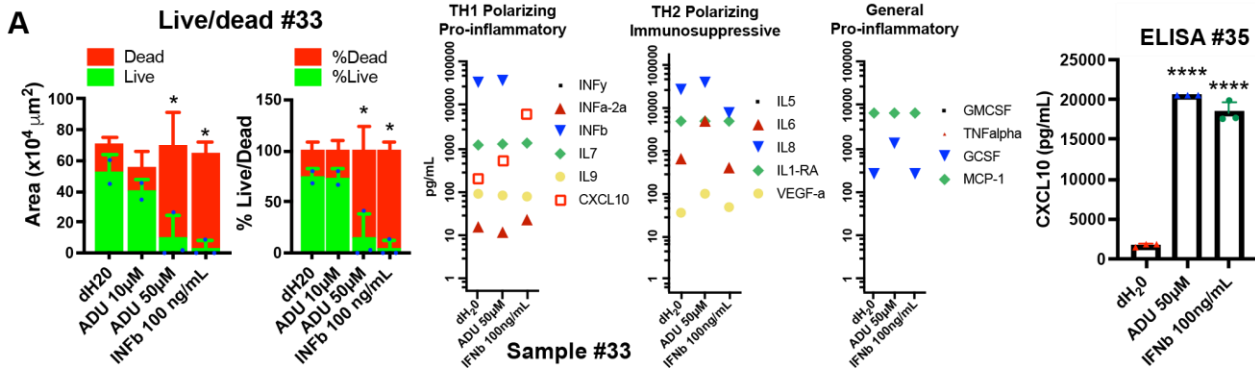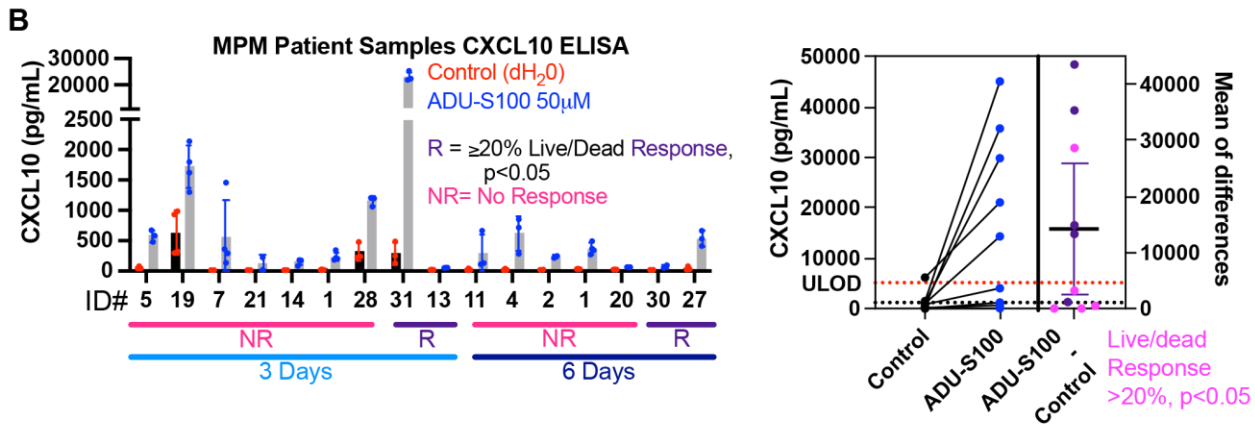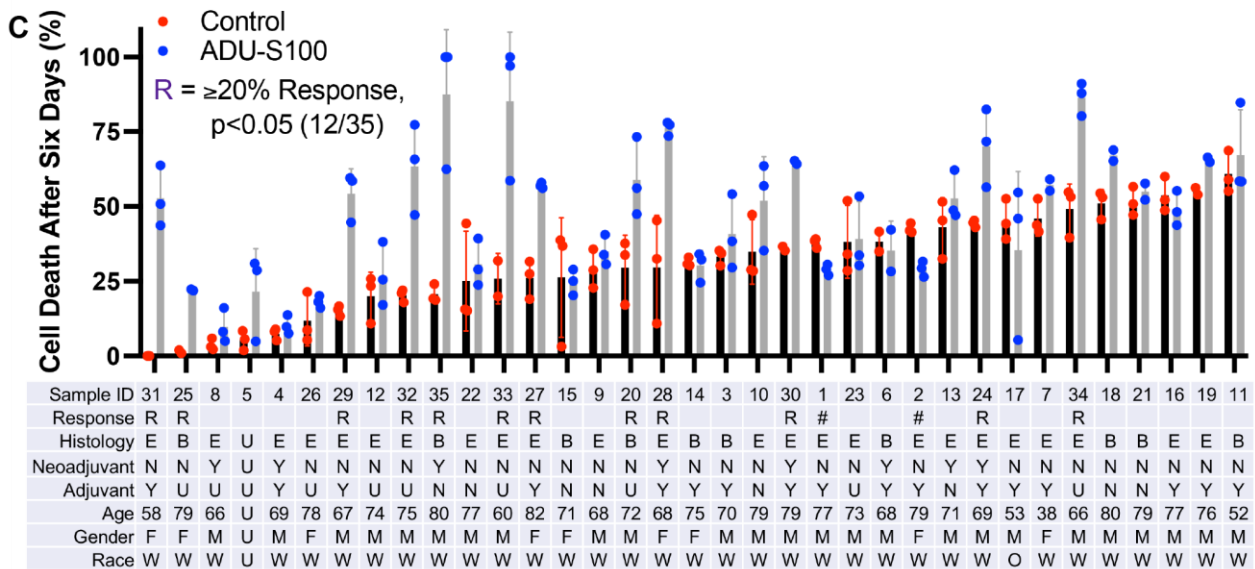

**A**, Hoechst/propidium iodide cell area and percent live/dead quantification from case #33 after 6-day treatment with 50 μM ADU-S100 (ADU) or dH<sub>2</sub>O and 100ng/mL IFNb controls. T-test vs. dH<sub>2</sub>O control: \*p<0.05. MSD cytokine array performed on conditioned media from samples in the previous panel. ELISA for CXCL10 performed on conditioned media from tumor explants (S1 fragment) of case #35 with exceptional live/dead response. Three-day treatment with ADU-S100 or IFNb positive control. T-test vs. dH<sub>2</sub>O control: \*\*\*\*p<0.0001.

**B**, CXCL10 ELISA from MPM explants treated for 3 days (S1) or PDOTS treated for 6 days (S2) with 50 μM ADU-S100 (ADU) or dH<sub>2</sub>O control. Estimation plot for CXCL10 from MSD cytokine panel performed on 10 MPM PDOTS after 3 days of explant (S1) treatment with 50 μM ADU-S100 or dH<sub>2</sub>O control. Live/dead response from IF stain designated by pink dot color.

**C**, Summary of MPM PDOTS cell death after 6-day treatment with 50 μM ADU-S100 or dH<sub>2</sub>O control, plotted from left to right with increasing cell death in the control condition. R = response to treatment with cell death >20% above control, T-test p<0.05; # = less cell death with ADU-S100 treatment, p<0.05. E = epithelioid MPM, B = biphasic MPM, Y/N = yes/no neoadjuvant treatment. F = female, M = Male gender. W = white/Caucasian, O = other race. U = unknown demographic.



## Supplementary Figure S6: STING agonists activate tumor cell STING causing CD8-cell killing

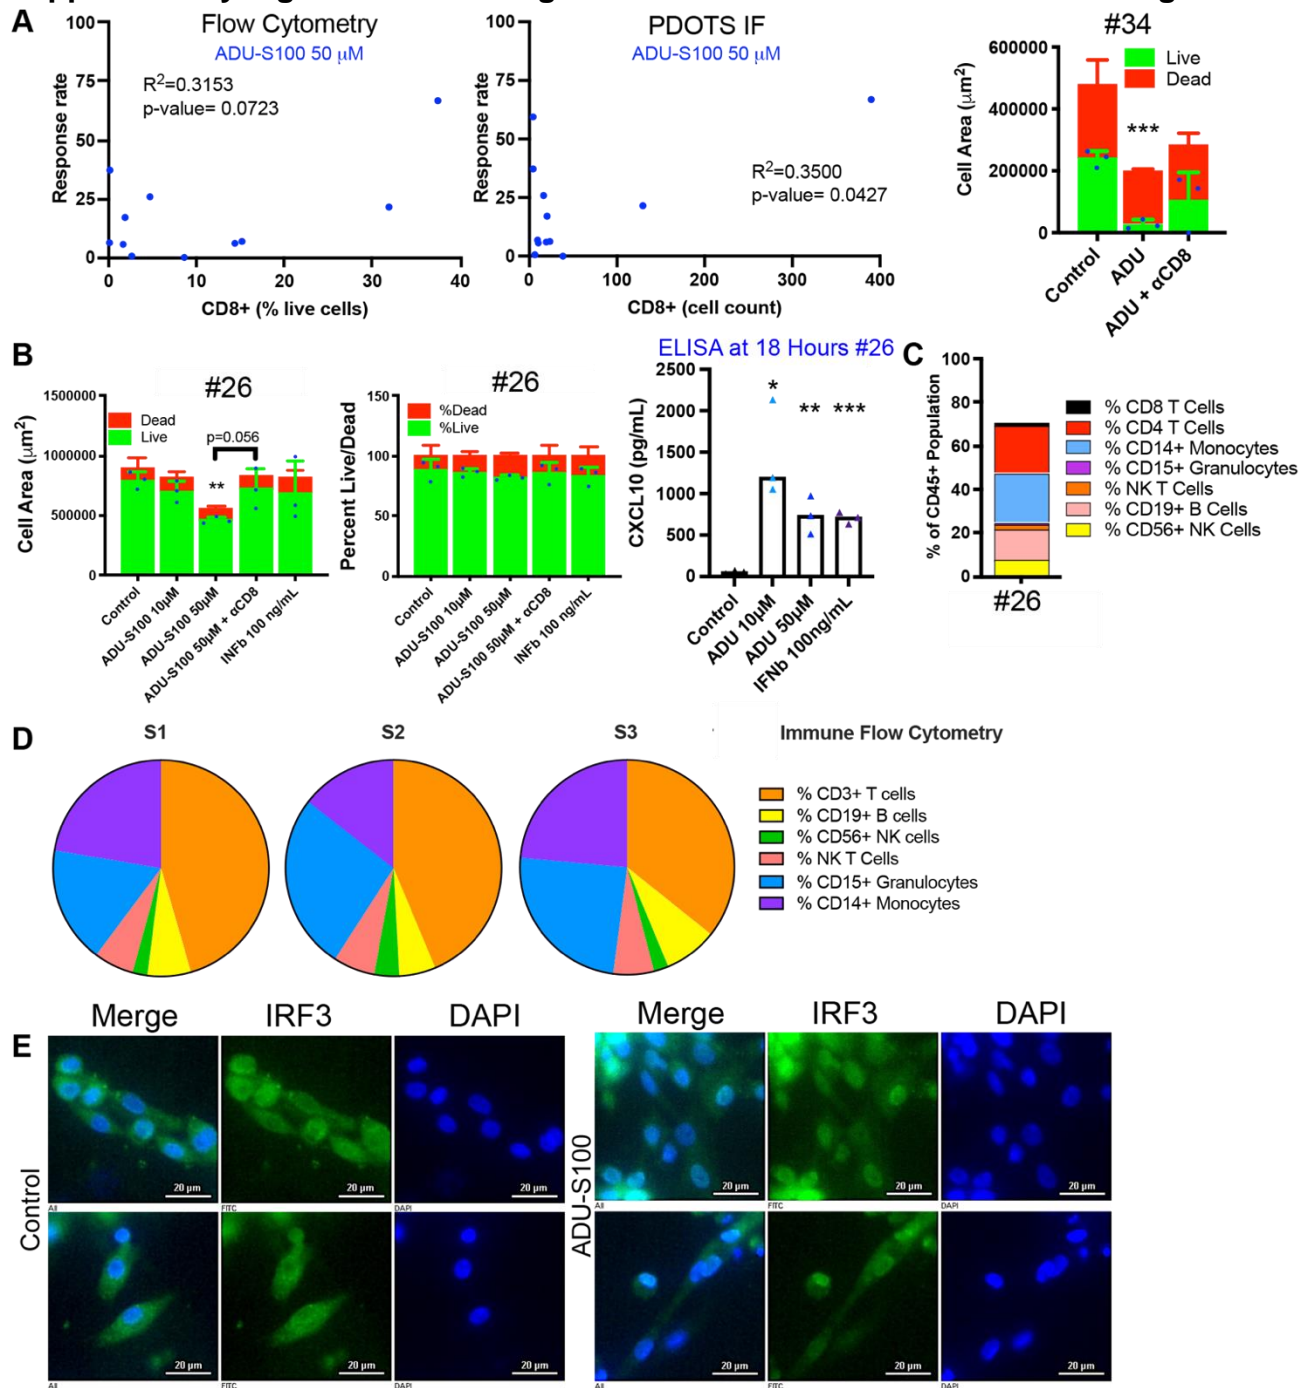

**A**, Correlation between CD8 flow cytometry (S3,  $n = 11$ ) or CD8 immunofluorescence (S2,  $n = 12$ ) at the time of sample collection for MPM PDOTS and subsequent live/dead response (6 days 50  $\mu\text{M}$  ADU-S100 treatment cell death minus control cell death). CD8 cell count per PDOTS well/chamber. Linear regression analysis shown. Hoechst/propidium iodide cell area for sample #34 after 6 days of treatment with 50  $\mu\text{M}$  ADU-S100 or dH2O control and CD8 neutralizing antibody ( $\alpha\text{CD8}$ ). T-test vs. dH2O control: \*\*\* $p < 0.001$ . **B**, Characterization of sample #26 where scRNA sequencing was performed. Hoechst/propidium iodide cell area and percent live/dead quantification after 6-day treatment with ADU-S100 +/- anti-CD8 neutralizing antibody, dH2O control or 100ng/mL IFN $\beta$ . T-test vs. dH2O control. CXCL10 ELISA from S1 explant conditioned media after 18 hours of treatment with 10 or 50  $\mu\text{M}$  ADU-S100 or 100ng/mL IFN $\beta$ . T-test vs. dH2O control: \* $p < 0.05$ , \*\* $p < 0.01$ , \*\*\* $p < 0.001$ . **C**, Flow cytometry from S3 of sample #26. **D**, MPM immune flow cytometry profiling example comparing different sample fractions. **E**, IRF3 immunofluorescence in PDOTS #34 after 3-hours of treatment with 50  $\mu\text{M}$  ADU-S100 or dH2O control. Scale bar = 20  $\mu\text{m}$ .

**Supplementary Figure S7: scRNA seq demonstrates STING activation in tumor cells and fibroblasts**

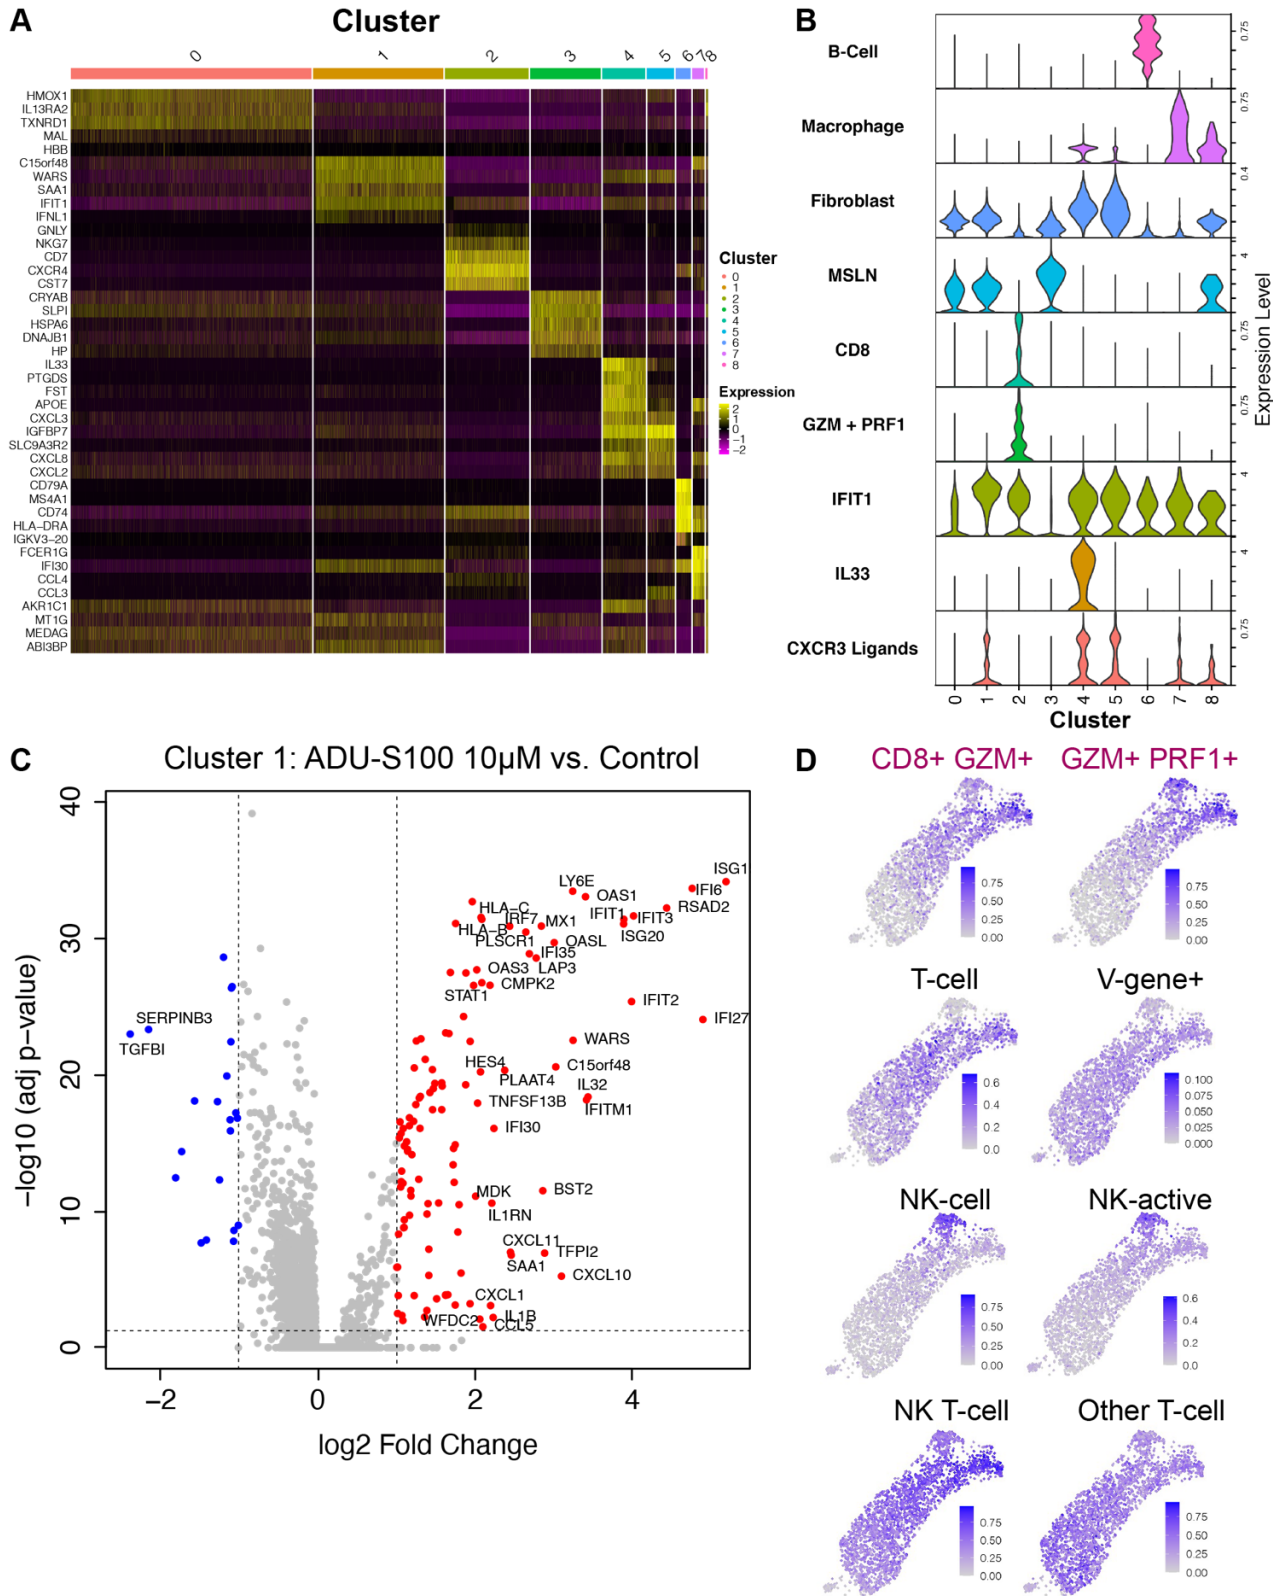

**A**, Heat maps for cluster-defining genes. **B**, Violin plots for immune cell and fibroblast signatures in addition to mesothelin (MSLN), CD8, combined granzyme + perforin (GZM + PRF1), IFIT1, IL33 and CXCR3 ligands (CXCL9/10/11) shown by cluster. **C**, Volcano plot of differentially expressed genes after 24 hours of treatment with 10  $\mu$ M ADU-S100 or dH<sub>2</sub>O control. **D**, UMAP plots for specified transcripts and signatures focused on effector cell cluster 2.

## Supplementary Figure S8: scRNAseq suggests STING agonist toxicity in T-cells

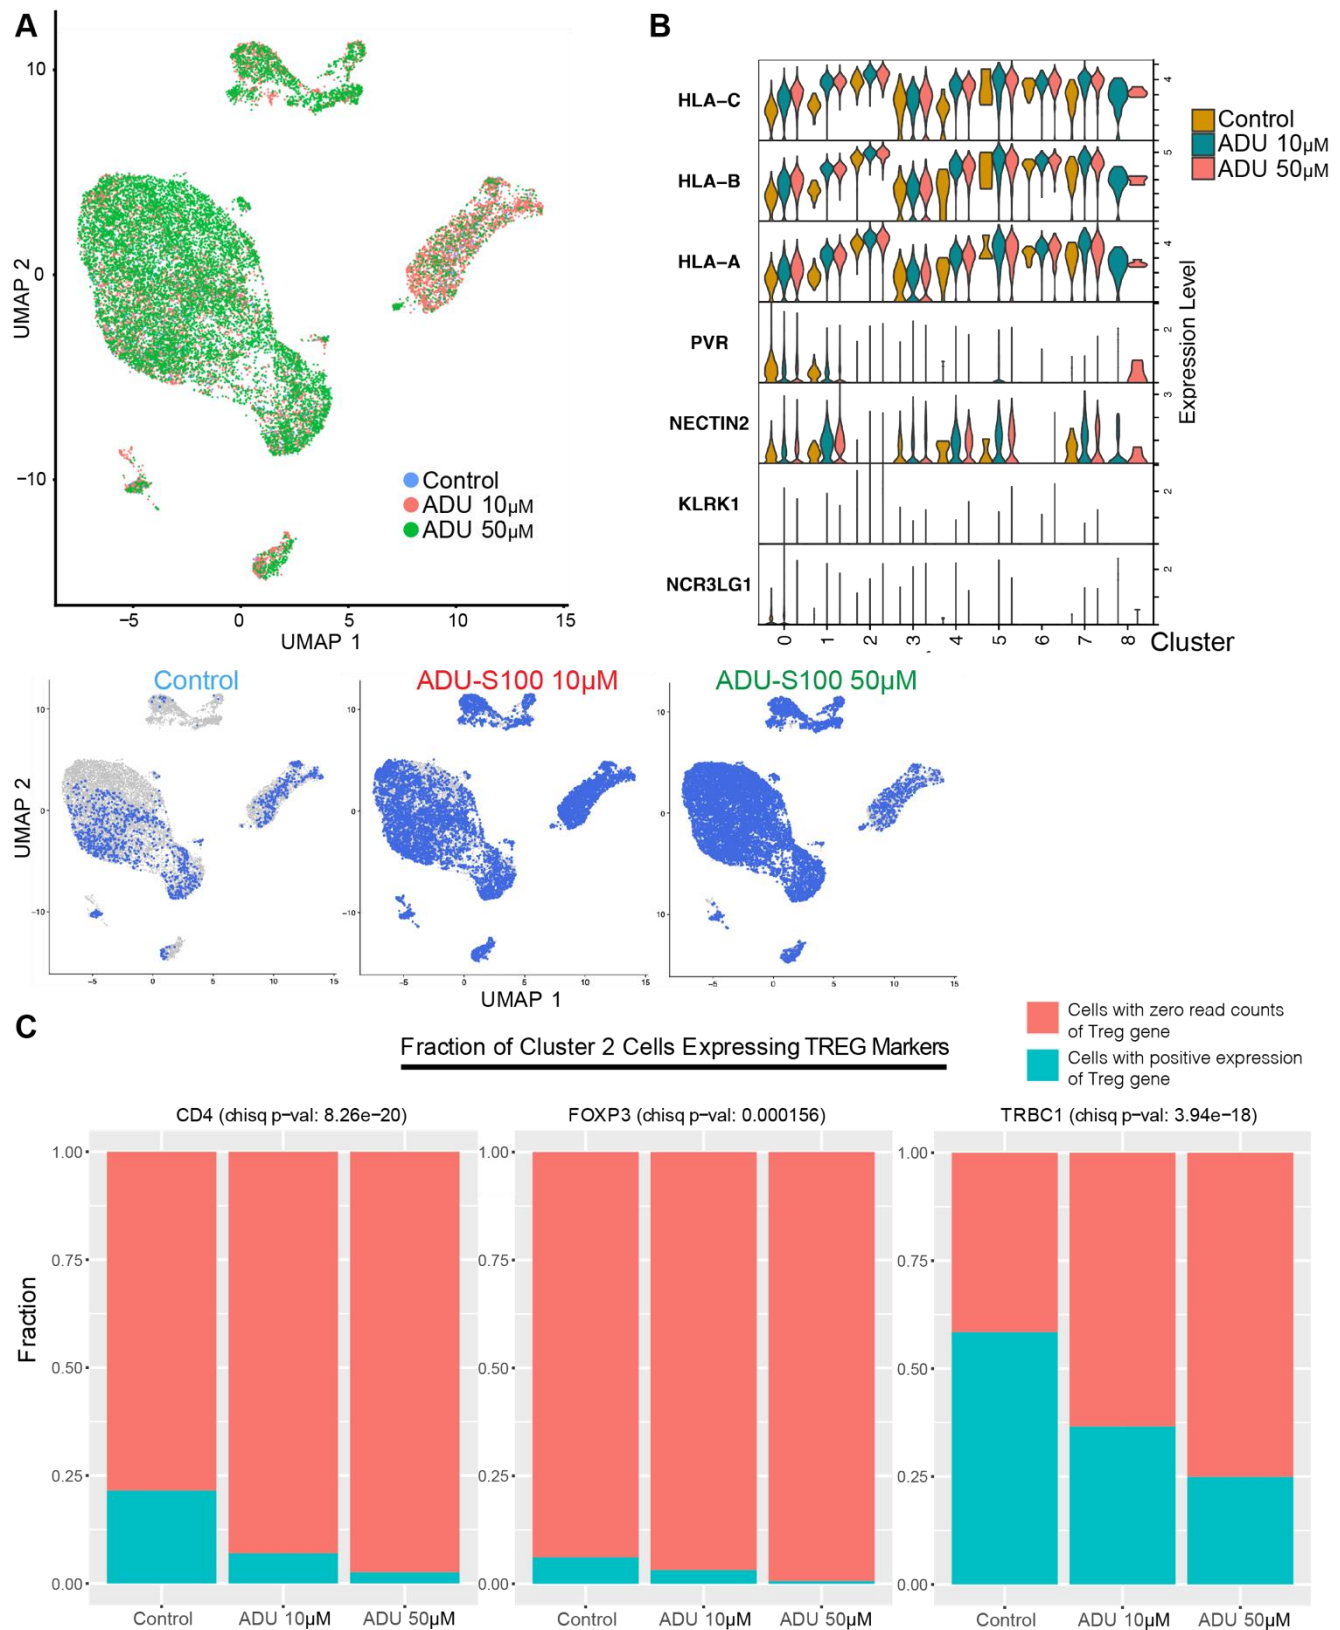

**A**, Combined UMAP plot from broad clustering of scRNA sequencing of MPM specimen #26 after 24 hours of treatment with dH<sub>2</sub>O control, 10  $\mu$ M and 50  $\mu$ M ADU-S100, with the contribution of each treatment shown together and separately. **B**, Violin plots for select NK cell activating/inhibitory transcripts from combined broad clustering split by treatment condition/dose of ADU-S100. **C**, Fraction bar graph showing expression of Treg transcripts in cluster 2 for each treatment, normalized to number of cells per sample.



## Supplementary Figure S9: STING agonists are toxic to T-cells but not NK cells

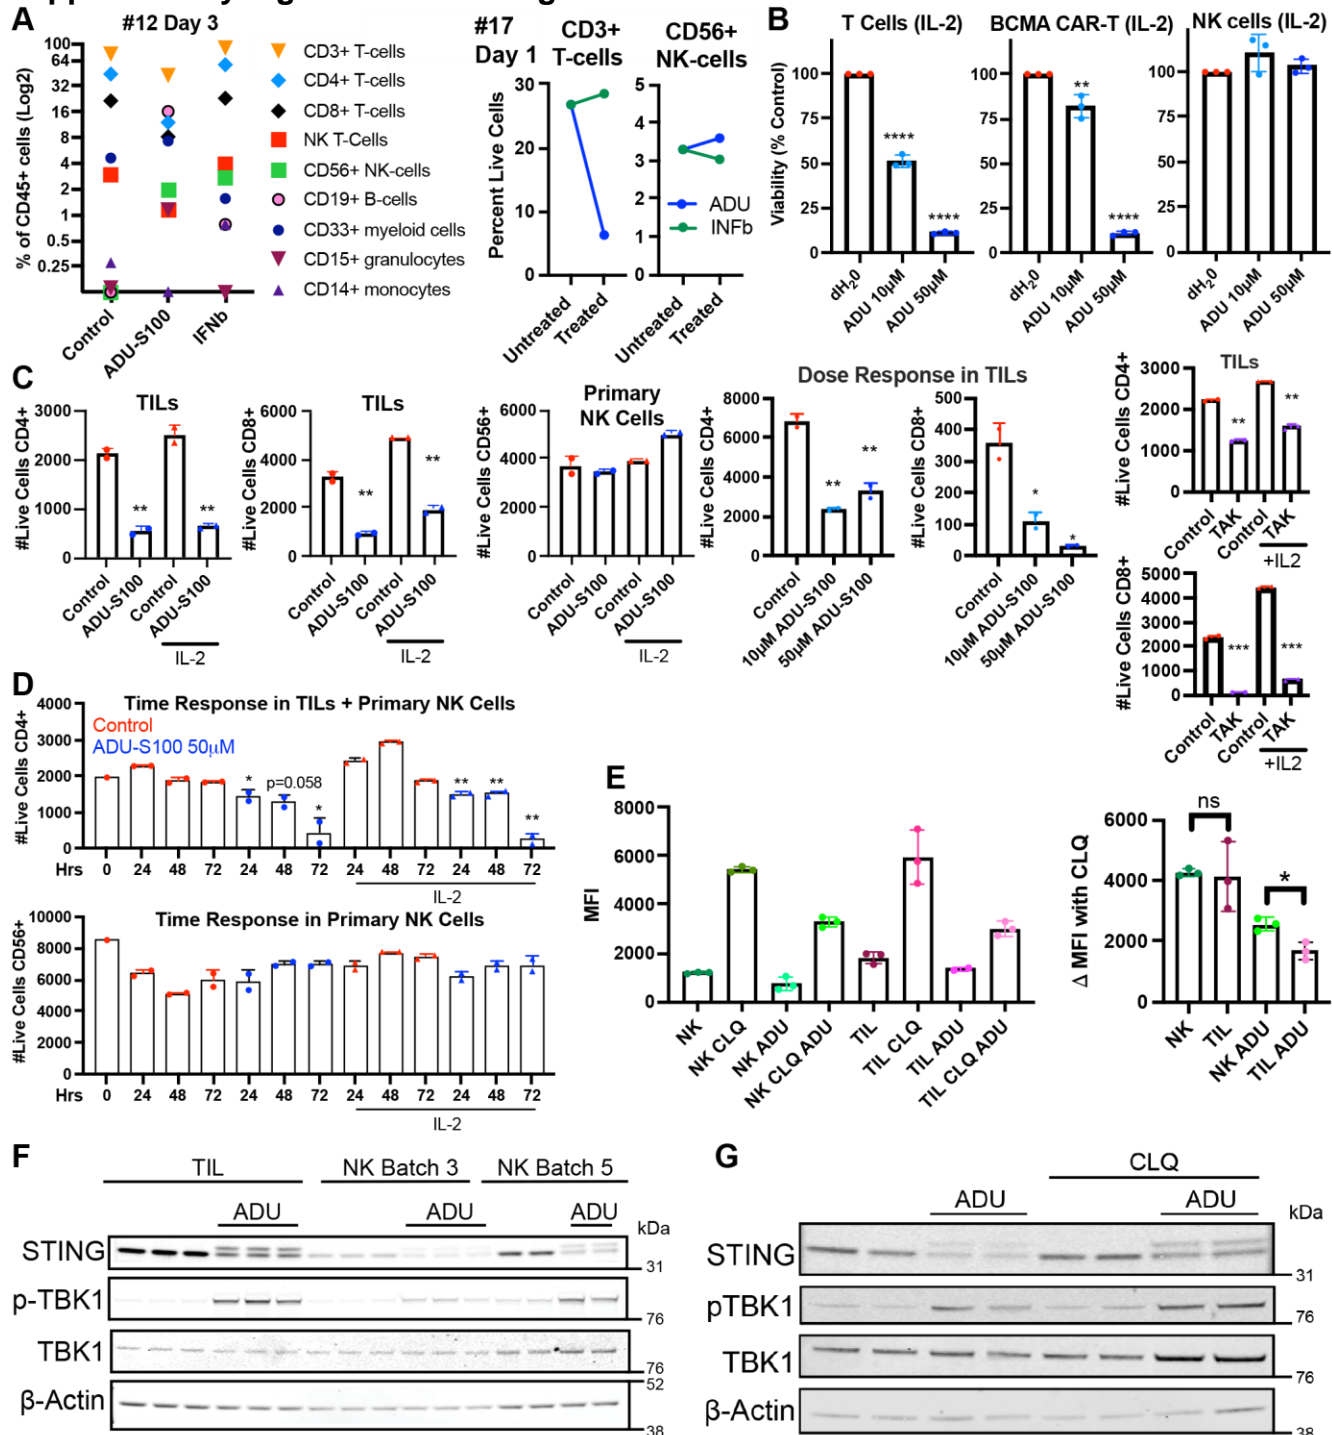

**A**, CD3/CD56 flow cytometry after 3- or 1-day treatment with 50  $\mu$ M ADU-S100, 100ng/mL IFN $\beta$ , or dH2O control S1 explants from samples #12 and #17. **B**, CellTiter-Glo viability in primary T-cells, BCMA CAR T-cells, and batch 2 primary NK cells treated for 24-hours with 10 or 50  $\mu$ M ADU-S100 or dH2O control in the presence of 200 U/mL IL-2. T-test vs. dH2O control: \*\* $p < 0.01$ , \*\*\*\* $p < 0.0001$ . **C**, CD4/CD8 flow cytometry after 72-hour treatment with 50  $\mu$ M ADU-S100, 10  $\mu$ M TAK-676, or dH2O control in batch 3 TILs compared with flow for CD56 in batch 2 NK cells expanded from PBMCs +/- 200 U/mL IL-2. T-test vs. control: \* $p < 0.05$ , \*\* $p < 0.01$ , \*\*\* $p < 0.001$ . **D**, Time course of toxicity for CD4+ T-cells from batch 1 TILs co-cultured with batch 2 NK cells. T-test vs. control at that timepoint: \* $p < 0.05$ , \*\* $p < 0.01$ . Dose-dependent toxicity for CD4/CD8 T-cells from TILs. One-way ANOVA  $p < 0.01$  with corrected pairwise comparisons: \* $p < 0.05$ , \*\* $p < 0.01$ . **E**, Mean fluorescence intensity (MFI) plots from flow cytometry for autophagolysosome vacuoles after 24-hour treatment with 10  $\mu$ M chloroquine (CLQ) followed by 24-hour treatment with CLQ +/- 50  $\mu$ M ADU-S100 (ADU) in batch 6 NK cells or

batch 2 TILs. T-test: \* $p < 0.05$ . **F**, Western blot for STING, phospho-TBK1 (pTBK1), TBK1 and beta-actin load control after 6-hour treatment with 50  $\mu\text{M}$  ADU-S100 or dH<sub>2</sub>O control in batch 2 TILs compared with batch 3 NK cells in triplicate and batch 5 NK cells in duplicate. **G**, Western blot from batch 6 NK cells treated for 6 hours with 50  $\mu\text{M}$  ADU-S100 or dH<sub>2</sub>O and 10  $\mu\text{M}$  chloroquine or DMSO control in duplicate.

## Supplementary Figure S10: STING agonists enhance NK cell killing in MPM PDOTs

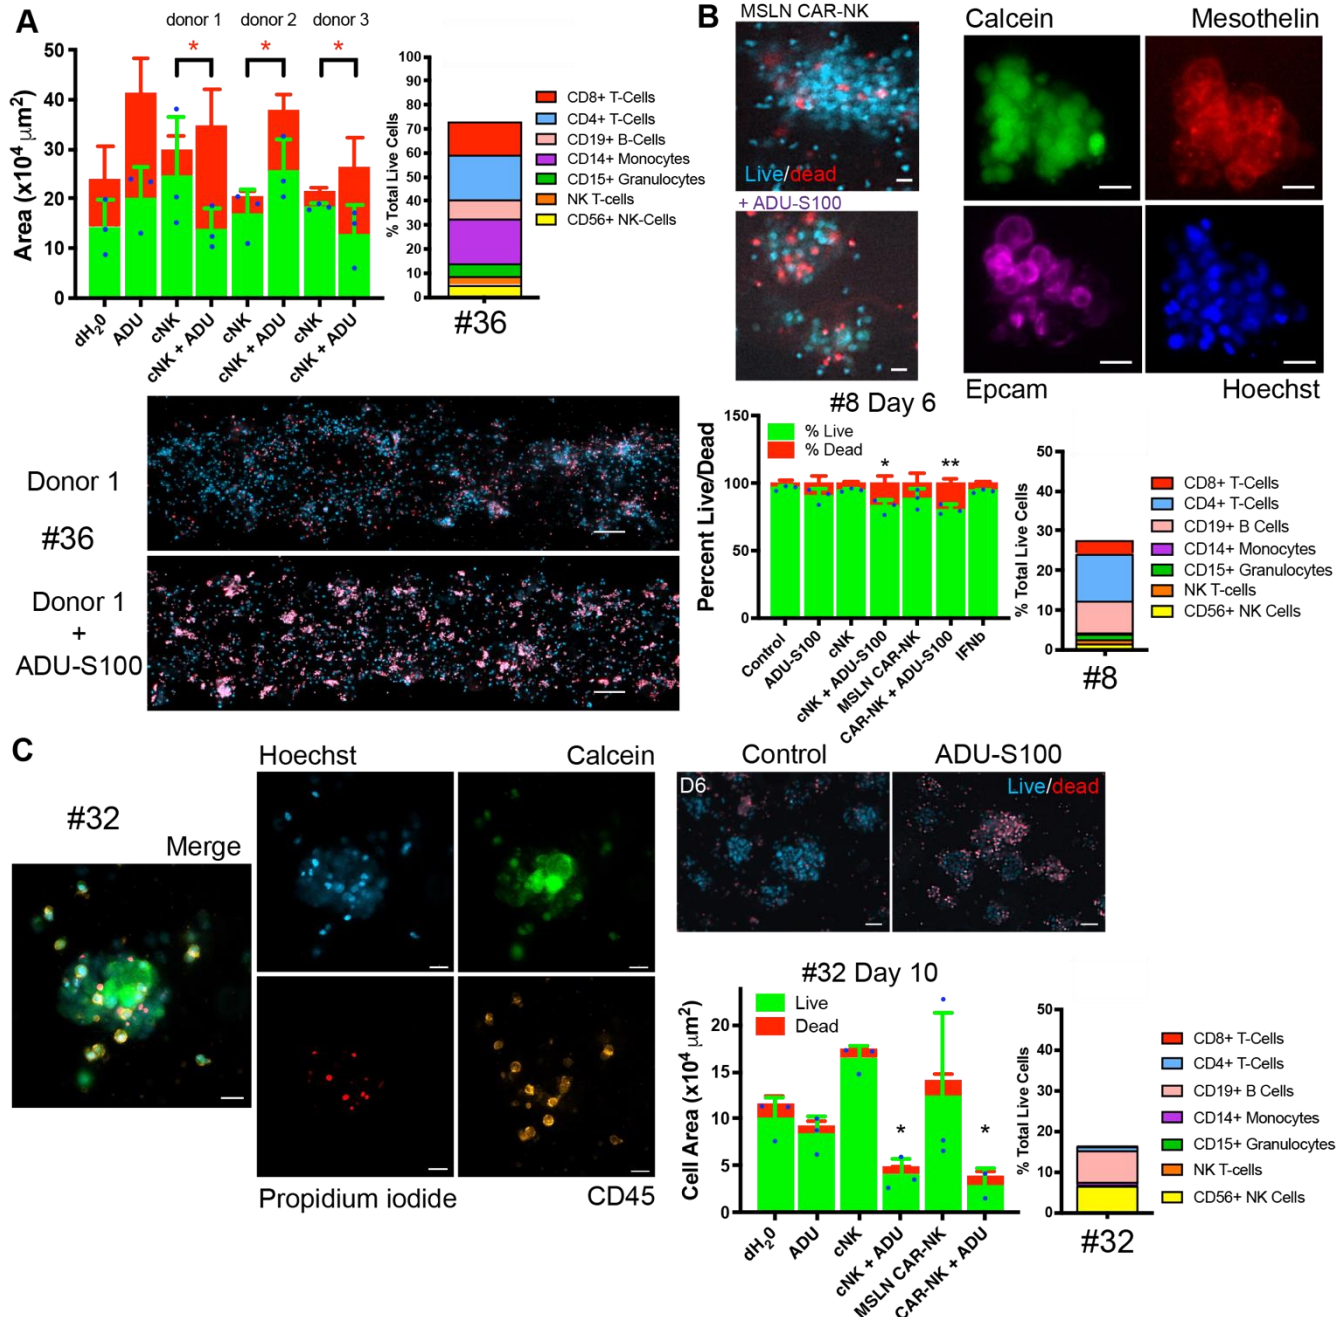

**A**, Hoechst/propidium iodide cell area quantification and live/dead immunofluorescence from sample #36 after 6-day treatment with 50  $\mu\text{M}$  ADU-S100 (ADU) or dh<sub>2</sub>0 +/- untransduced primary NK cells (cNK) from three donors. T-test: \* $p < 0.05$ . Baseline immune flow cytometry from S3. Scale bars = 50  $\mu\text{m}$ . **B**, IF and Hoechst/propidium iodide live/dead quantification from S2 for sample #8 after 6-day treatment with 50  $\mu\text{M}$  ADU-S100 (ADU) or dh<sub>2</sub>0 +/- untransduced primary NK cells (cNK) or anti-mesothelin (MSLN) CAR-NK cells, 100ng/mL IFN $\beta$  control. Scale bars = 20  $\mu\text{m}$ . T-test vs. dh<sub>2</sub>0 control: \* $p < 0.05$ , \*\* $p < 0.01$ . Baseline immune flow cytometry from S3. **C**, IF and live/dead cell area quantification from S2 for sample #32 after 6- or 10-day treatment with 50  $\mu\text{M}$  ADU-S100 (ADU) or dh<sub>2</sub>0 +/- untransduced primary NK cells (cNK) or anti-mesothelin (MSLN) CAR-NK cells. Scale bars for Hoechst, Calcein, propidium iodide, CD45 = 20  $\mu\text{m}$ . Live/dead scale bars = 50  $\mu\text{m}$ . T-test vs. dh<sub>2</sub>0 control: \* $p < 0.05$ . Baseline immune flow cytometry from S3.

# Supplementary Figure S11: STING agonists enhance NK cell migration and killing

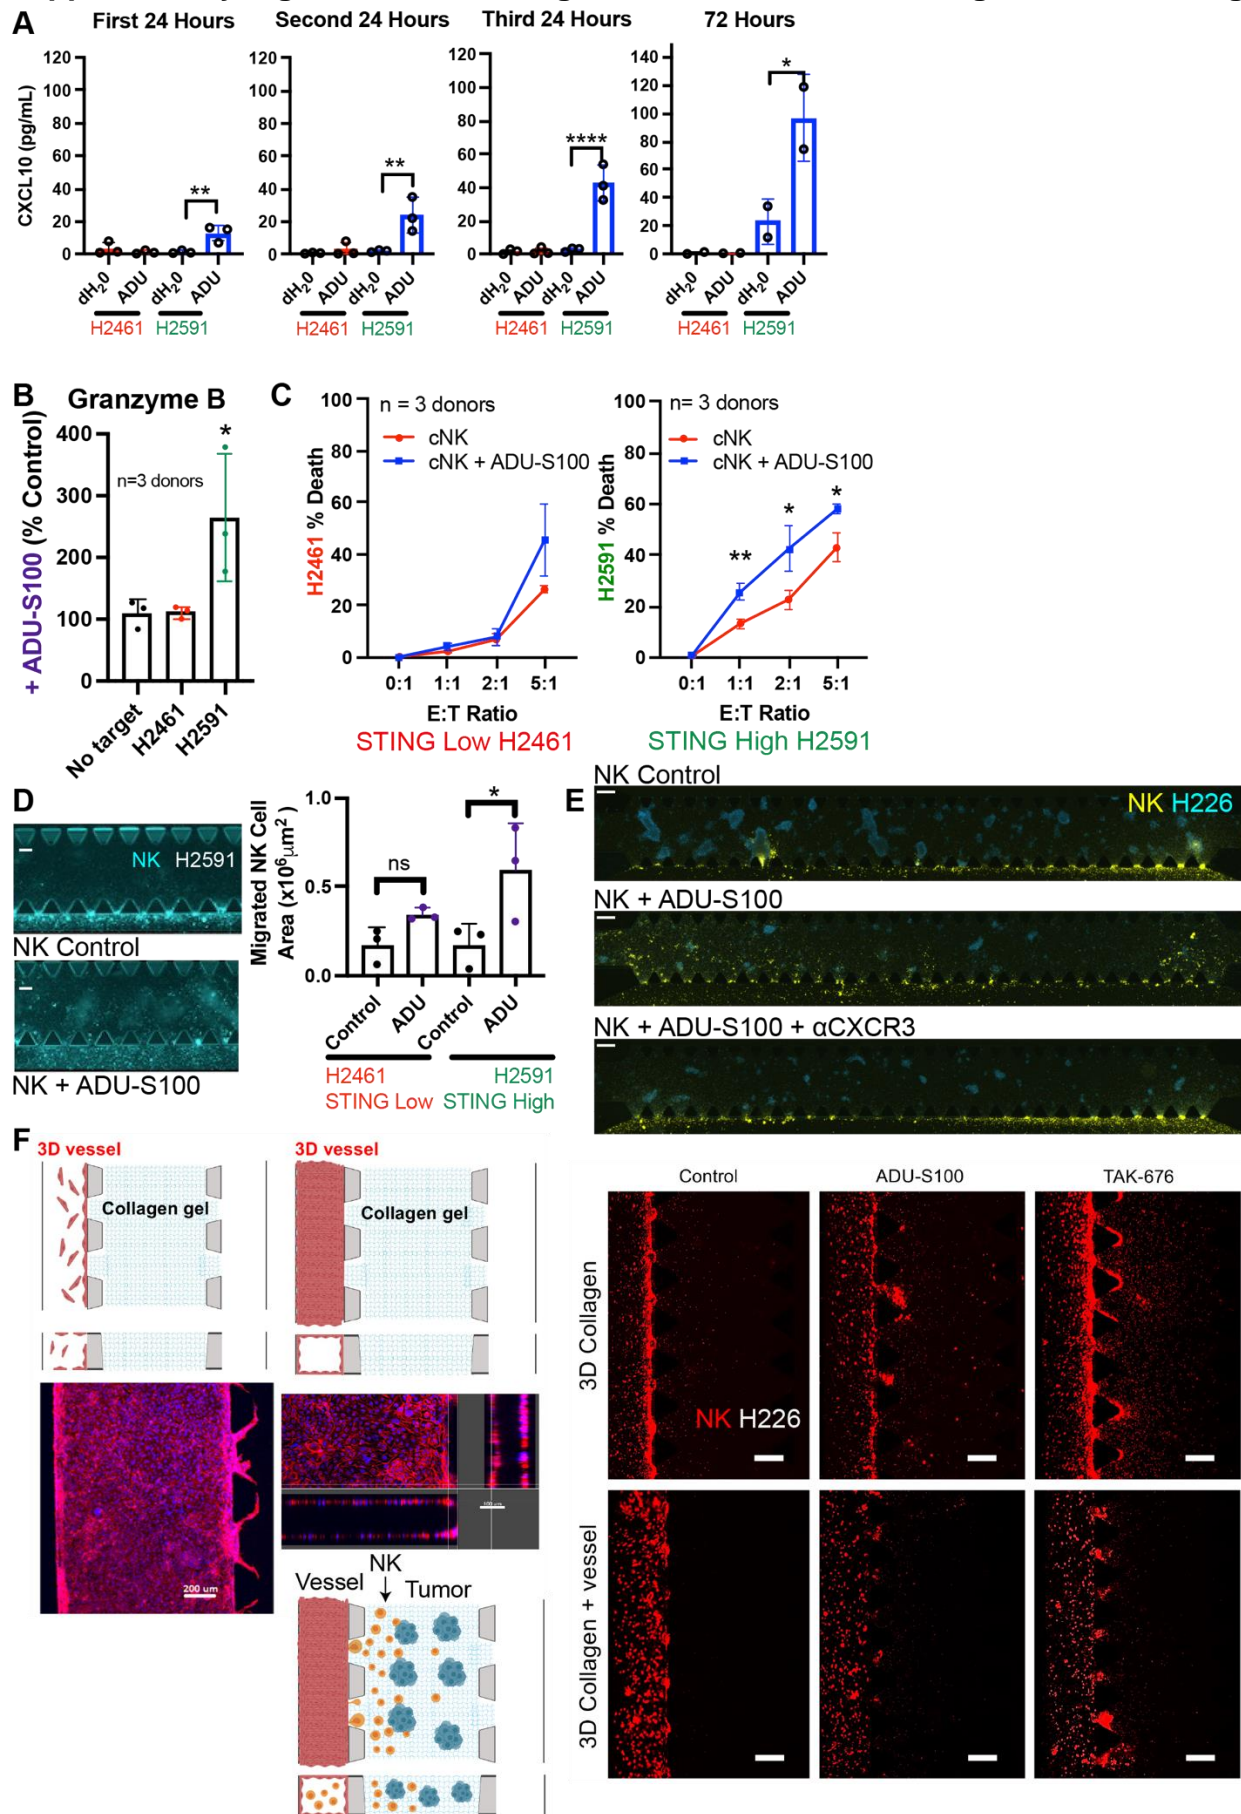

**A**, CXCL10 ELISA on conditioned media from STING high and low MPM cell lines seeded in collagen in AIM chips and treated for 24-72 hours with 50  $\mu$ M ADU-S100 or dH<sub>2</sub>O control in the media side channels. T-test: \* $p$ <0.05, \*\* $p$ <0.01, \*\*\*\* $p$ <0.0001. **B**, Granzyme B ELISA after 24 hours of treatment with 50  $\mu$ M ADU-S100 or dH<sub>2</sub>O control in primary NK cells +/- target cell lines. One-sample t-test with expected percent control of 100: \* $p$ <0.05. **C**, Flow cytometry for annexin V and live/dead with H2591 MPM cells in co-culture with NK cells. Quantification for three NK cell donors across E:T ratios, graphed as percent target cell death. T-test: \* $p$ <0.05, \*\* $p$ <0.01. **D**, Representative IF images of primary NK cells labeled with cell tracker migrating toward H2591 MPM cells after 4-day treatment with 50  $\mu$ M ADU-S100 or dH<sub>2</sub>O control. Scale bar = 200  $\mu$ m. Quantification of NK cell migration from experimental triplicate. One-way ANOVA  $p$ <0.05 with corrected pairwise comparisons: \* $p$ <0.05. **E**, Representative IF images of NK cell migration towards H226 MPM tumor cells after 4-day treatment with 50  $\mu$ M ADU-S100 +/- 5  $\mu$ g/mL CXCR3 neutralizing antibody ( $\alpha$ CXCR3). Scale bar = 150  $\mu$ m. **F**, Schematic and IF for 3D migration assay with vessel co-culture and representative IF images of NK cell migration towards H226 MPM tumor cells after 24-hour treatment with 50  $\mu$ M ADU-S100, 1  $\mu$ M TAK-676, or dH<sub>2</sub>O control. Scale bar = 150  $\mu$ m.



## Supplementary Figure S12: STING agonists enhance CAR-NK cell killing in MPM

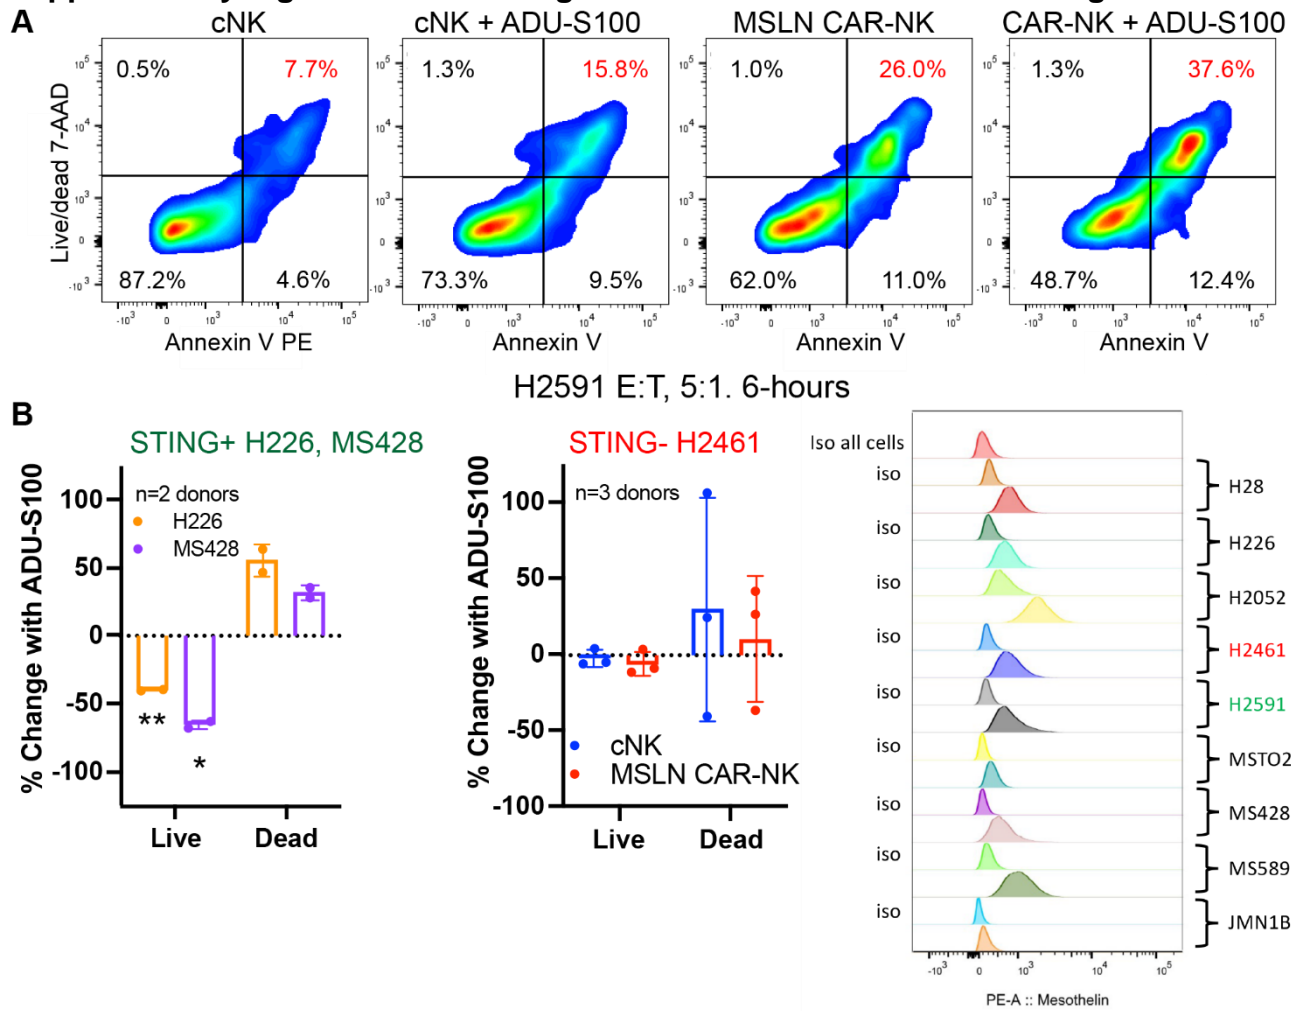

**A**, Flow cytometry for annexin V and live/dead of H2591 MPM cells in co-culture with control NK (cNK) or MSLN CAR-NK cells (E:T 5:1) following 6-hour treatment with 50  $\mu$ M ADU-S100 or dH2O control. **B**, Quantification of two NK cell donors targeting two additional STING-expressing MPM cell lines (H226, MS428), graphed as percent change with ADU-S100 vs. dH2O control treatment. One-sample t-test with expected difference of zero: \* $p < 0.05$ , \*\* $p < 0.01$ . Quantification of three NK cell donors with cNK and MSLN CAR NK targeting STING-negative H2461, graphed as percent change with ADU-S100 vs. dH2O control. MSLN flow cytometry in MPM cell lines.
